# Supplementary material
Source: Springer Nature journal article supplement (https://www.springermedizin.de/resource/supplementary/12889_2011_3951_MOESM1_ESM.PDF/9491138)

**Table S1: Topic guidelines for interviews with the parents with AFP**

---

**Topic 1. Experience around the Usage of Health Facilities at the Time of Onset of the Disease (Patient History)**

---

- 1.1 What were the symptoms of your child when you first noticed something was wrong?  
[Probe: How did you first notice something was wrong with your child? How did you come to know about your child's disease?]
- 1.2 When was it?
- 1.3 Where did you take him/her to? What doctor?
- 1.4 Why did you take her to [the place mentioned in 1.3]?
- 1.5 What happened after that?  
[Probe: What kind of exams did you have to go through? What kind of treatment did you get? Did you have to go somewhere else? etc.]
- 1.6 What information did doctors give you for your child's disease?
- 1.7 Did your child do a stool test?
- 1.8 Where did your child have the stool test done? At hospital or somebody come to your house?
- 1.9 What kind of treatment, support, or care did you get after the stool test from the people visiting you at your house [ANMs, doctors]?
- 1.10 What information did they provide you with polio about the illness [regarding the characteristic of the disease, e.g., prognosis]?
- 1.11 Also, what information did they provide you regarding treatment, support, and care of the disease [polio]?
- 1.12 What happened when the result of the stool test came?  
[Did some one explain the result to you? If yes, what kind of explanation did you get? If no, why didn't you get the result?]
- 1.13 What happened after you got the result for the stool test?  
[Were you still visited by the doctors and ANMs?]
- 1.14 Were you visited after 2 months time after you went to hospital for the first time? (60-day follow-up to see residual paralysis)
- 1.15 What do you think of these services by the government they've got for your child?

---

**Topic 2. Treatment, support & care**

---

- 2.1 Where are you getting treatment/support/care for your child? If not getting any, then why?
- 2.2 What kind of treatment/support/care?
- 2.3 Why did you choose to get the service from [answer of 2.1]?
- 2.4 What were your difficulties getting treatment, support, and care at the time of onset of polio?  
[e.g., cost, transportation, etc.]
- 2.5 What are your difficulties now getting treatment, support, and care for your child?
- 2.6 What did/do you feel about the cost of treatment?
- 2.7 How is the treatment cost affecting your family?

---

**Topic 3. Difficulties with the symptom of the child**

---

- 3.1 How is your child now?  
[Probe: recovered, symptoms still remaining (e.g., cannot sit up, cannot walk)?]
- 3.2 What are your challenges and difficulties of looking after this child? Please share actual experiences.

---

**Topic 4. Needs and suggestions for the future**

---

- 4.1 What kind of information should have been helpful for you at the time when you were visiting hospitals? Also for now and for the future?
- 4.2 What kind of help (support and care) did you needed or think situation would have been better if you had?
- 4.3 What are your suggestions for support and care for a child like yours?
- 4.4 Any other suggestions?

---

**Topic 5. Experience and Understanding of Polio and Polio Vaccine**

---

- 5.1 How many times your children has gone through this drop?
- 5.2 Did you ask the doctor why your child got polio despite you giving the drops? What did they tell you?
- 5.3 In what way have your views of the polio drops changed after your child having the disease?

---

**Topic 6. Experience with the Routine Immunisation**

---

- 6.1 Have you been going through immunisation other than polio? If yes, what? If no, why not?
- 6.2 What do you think are the differences between the polio drops and other immunisation?  
[Probe: access is difficult, cost, lack of information, etc.]

---

**Topic 7. Experience and Perceptions around Child Health and Healthcare**

---

- 7.1 Please explain your daily meal. (How many times? What do you eat?)
- 7.2 Do your child get sick often? If yes, what kind of disease?
- 7.3 What kind of treatment or support / care do they get for this? From where?
- 7.4 Do you see any differences between the support you are getting for paralysis and for other diseases? What are your thoughts around this?
- 7.5 What kind of services do you need for your child?
- 7.6 How do you think health services for children in your area can be improved?

**Table S2: Topic guidelines for interviews with healthcare workers and key informants**

\*Questions are excluded if not relevant to the respondent.

---

**Topic 1. Perceptions around Child Health and Healthcare**

---

- 1.1 How is the health condition of children in the area?
- 1.2 What kind of disease is commonly seen among children?
- 1.3 What do you think are the priorities taken by the community regarding child health?
- 1.4 What do you think of the health system in the area? How is it affecting child health?
- 1.5 What are the things that you think should be done to improve the health condition of children in your area?

---

**Topic 2. Perceptions and Experiences with Vaccinating Children**

---

- 2.1 What is your perception on the polio drops?
- 2.2 Do people come to your clinic for polio drops?
- 2.3 What information do you give to mothers when you are giving the children the polio drops?
- 2.4 Do you face any resistance from mothers? If yes, who resist and for what reasons?
- 2.5 Have you seen any changes in mothers' view/perception to the polio drops over the years?
- 2.6 What impact do you think the polio drops are having on the community?
- 2.7 How is routine immunisation in the area? If it is not good, what are the reasons behind?

---

**Topic 3. Perceptions and Experiences with the AFP Cases including Poliomyelitis**

---

- 3.1 How is a child diagnosed as acute flaccid paralysis (AFP)?
- 3.2 What happens to a child after a diagnosis is given as acute flaccid paralysis?
- 3.3 Do you know any child who is diagnosed as acute flaccid paralysis? If yes, is there a trend to what kind of family they come from?
- 3.4 What kind of treatment or care are the children with acute flaccid paralysis getting? (Are they getting followed-up? Are they getting any treatment or care/support? Do you visit them?)
- 3.5 Do you know any polio cases in the community? If yes, is there a trend to what kind of family they come from?
- 3.6 What kind of treatment or care are the children with polio getting? (Are they getting followed-up? Are they getting any treatment or care/support? Do you visit them?)
- 3.7 What do you think are the needs of these children?
- 3.8 What do you think should be done for the children with acute flaccid paralysis?
- 3.9 What do you think should be done for the children with polio?
- 3.10 What do you think of the AFP surveillance system? (e.g., process, effectiveness, quality, etc.)

**Table S3a: Expanded data for characteristics of confirmed polio cases in the study**

|                                    | Case Number     |                 |                 |                 |              |                 |                    |                 |                 |
|------------------------------------|-----------------|-----------------|-----------------|-----------------|--------------|-----------------|--------------------|-----------------|-----------------|
|                                    | 1               | 2               | 3               | 4               | 5            | 6               | 7                  | 8               | 9               |
| Gender                             | F               | F               | M               | F               | M            | F               | M                  | M               | M               |
| Age at interview                   | 1.5 yr.         | 3.5 yr.         | 3 yr.           | 2 yr.           | 2 yr.        | 4 yr.           | 2 yr.              | 2.5 yr.         | 2 yr.           |
| Age at onset                       | 1 yr.           | 2.5 yr.         | 2 yr.           | 11 m.           | 1 yr.        | 2.5 yr.         | 1.5 yr.            | 1.3 yr.         | 1.5 yr.         |
| Type of poliovirus*                | P3              | P3              | P3              | P3              | P3           | P3              | P3                 | P1              | P1              |
| Stool exam result*                 | P3 Wild/P3 Wild | P3 Wild/P3 Wild | P3 Wild/P3 Wild | P3 Wild/P3/Wild | P3 Wild/NPEV | P3 Wild/P3 Wild | P3 Vaccine/P3 Wild | P1 Wild/P1 Wild | P1 Wild/P1 Wild |
| No. of OPV through SIAs*           | 6               | 14              | 12              | 6               | 0            | 14              | 13                 | 10              | 8               |
| No. of OPV through RI*             | 2               | 0               | 1               | 1               | 6            | 1               | 0                  | 0               | 0               |
| OPV doses received before illness* | 8               | 14              | 13              | 7               | 6            | 15              | 13                 | 10              | 8               |
| Residual paralysis                 | No              | No              | No              | No              | No           | No              | No                 | Yes             | Yes             |
| Religion                           | Muslim          | Muslim          | Muslim          | Muslim          | Muslim       | Muslim          | Muslim             | Muslim          | Muslim          |
| Occupation of parents              | labourer        | labourer        | juice vendor    | labourer        | labourer     | labourer        | labourer           | labourer        | labourer        |
| Literacy of parents                | illiterate      | illiterate      | literate        | literate        | literate     | illiterate      | illiterate         | illiterate      | illiterate      |

|                                    | Case Number |            |                 |                  |                 |                 |              |                 |
|------------------------------------|-------------|------------|-----------------|------------------|-----------------|-----------------|--------------|-----------------|
|                                    | 10          | 11         | 12              | 13               | 14              | 15              | 16           | 17              |
| Gender                             | F           | M          | M               | M                | M               | M               | F            | M               |
| Age at interview                   | 6.5 yr.     | 2 yr.      | 2.5 yr.         | 2 yr.            | 2.5 yr.         | 2.5 yr.         | 3 yr.        | 9 yr.           |
| Age at onset                       | 6 yr.       | 10 m.      | 1.5 yr.         | 6 m.             | 1.8 yr.         | 1.7 yr.         | 2 yr.        | 8 yr.           |
| Type of poliovirus*                | P3          | P3         | P1              | P1               | P1              | P3              | P1           | P3              |
| Stool exam result*                 | NR          | NR         | P1 Wild/P1 Wild | P1 Wild/Negative | P1 Wild/P1 Wild | P3 Wild/P3 Wild | P1 Wild/NPEV | P3 Wild/P3 Wild |
| No. of OPV through SIAs*           |             |            | 6-8             | 16+              | 9               | 14              | 14           | 15              |
| No. of OPV through RI*             |             |            | 0               | 4                | 0               | 0               | 0            | 0               |
| OPV doses received before illness* |             |            | 6-8             | 20+              | 9               | 14              | 14           | 15              |
| Residual paralysis                 | No          | No         | Yes             | Yes              | No              | No              | Yes          | No              |
| Religion                           | Muslim      | Muslim     | Hindu           | Hindu            | Muslim          | Muslim          | Muslim       | Muslim          |
| Occupation of parents              | labourer    | labourer   | labourer        | labourer         | shop owner      | labourer        | businessman  | rickshaw puller |
| Literacy of parents                | illiterate  | illiterate | illiterate      | literate         | literate        | illiterate      | literate     | illiterate      |

NR: not recorded; SIAs: Supplementary Immunisation Activities; RI: Routine Immunisation; NPEV: non-polio enterovirus

**Table S3b: Expanded data for non-polio AFP cases in the study**

|                                    | Case Number       |            |                   |                   |                   |                   |                        |                   |                   |
|------------------------------------|-------------------|------------|-------------------|-------------------|-------------------|-------------------|------------------------|-------------------|-------------------|
|                                    | 1                 | 2          | 3                 | 4                 | 5                 | 6                 | 7                      | 8                 | 9                 |
| Gender                             | F                 | M          | M                 | M                 | M                 | F                 | M                      | M                 | M                 |
| Age at interview                   | 2 yr.             | 3 yr.      | 7 yr.             | 4 yr.             | 8 m.              | 4.5 yr.           | 3 yr.                  | 5 yr.             | 7 yr.             |
| Age at onset                       | 1.5 yr.           | 1.9 yr.    | 6.3 yr.           | 3.5 yr.           | 5 m.              | 4 yr.             | 2 yr.                  | 4.3 yr.           | 6 yr.             |
| Stool exam result*                 | Negative/Negative | NPEV/NPEV  | Negative/Negative | Negative/Negative | Negative/Negative | Negative/Negative | P3 Vaccine/P3 Vaccine  | Negative/Negative | Negative/Negative |
| No. of OPV through SIAs*           | 10                | 12         | 25                | 20                | NR                | 20                | 12                     | 24                | 20                |
| No. of OPV through RI*             | 2                 | 3          | 0                 | 1                 |                   | 0                 | 3                      | 1                 | 0                 |
| OPV doses received before illness* | 12                | 15         | 25                | 21                |                   | 20                | 15                     | 25                | 20                |
| Residual paralysis                 | No                | Yes        | No                | No                | No                | No                | No                     | Yes               | No                |
| Religion                           | Muslim            | Muslim     | Muslim            | Muslim            | Muslim            | Muslim            | Hindu                  | Hindu             | Muslim            |
| Occupation of parents              | furniture shop    | tailor     | driver            | labourer          | labourer          | labourer          | sugar mill<br>employee | labourer          | labourer          |
| Literacy of parents                | literate          | illiterate | illiterate        | literate          | illiterate        | illiterate        | literate               | illiterate        | illiterate        |

NR: not recorded; SIAs: Supplementary Immunisation Activities; RI: Routine Immunisation; NPEV: non-polio enterovirus

\* Data retrieved from medical record

Figure S1: Map of Muzaffarnagar and cases of polio

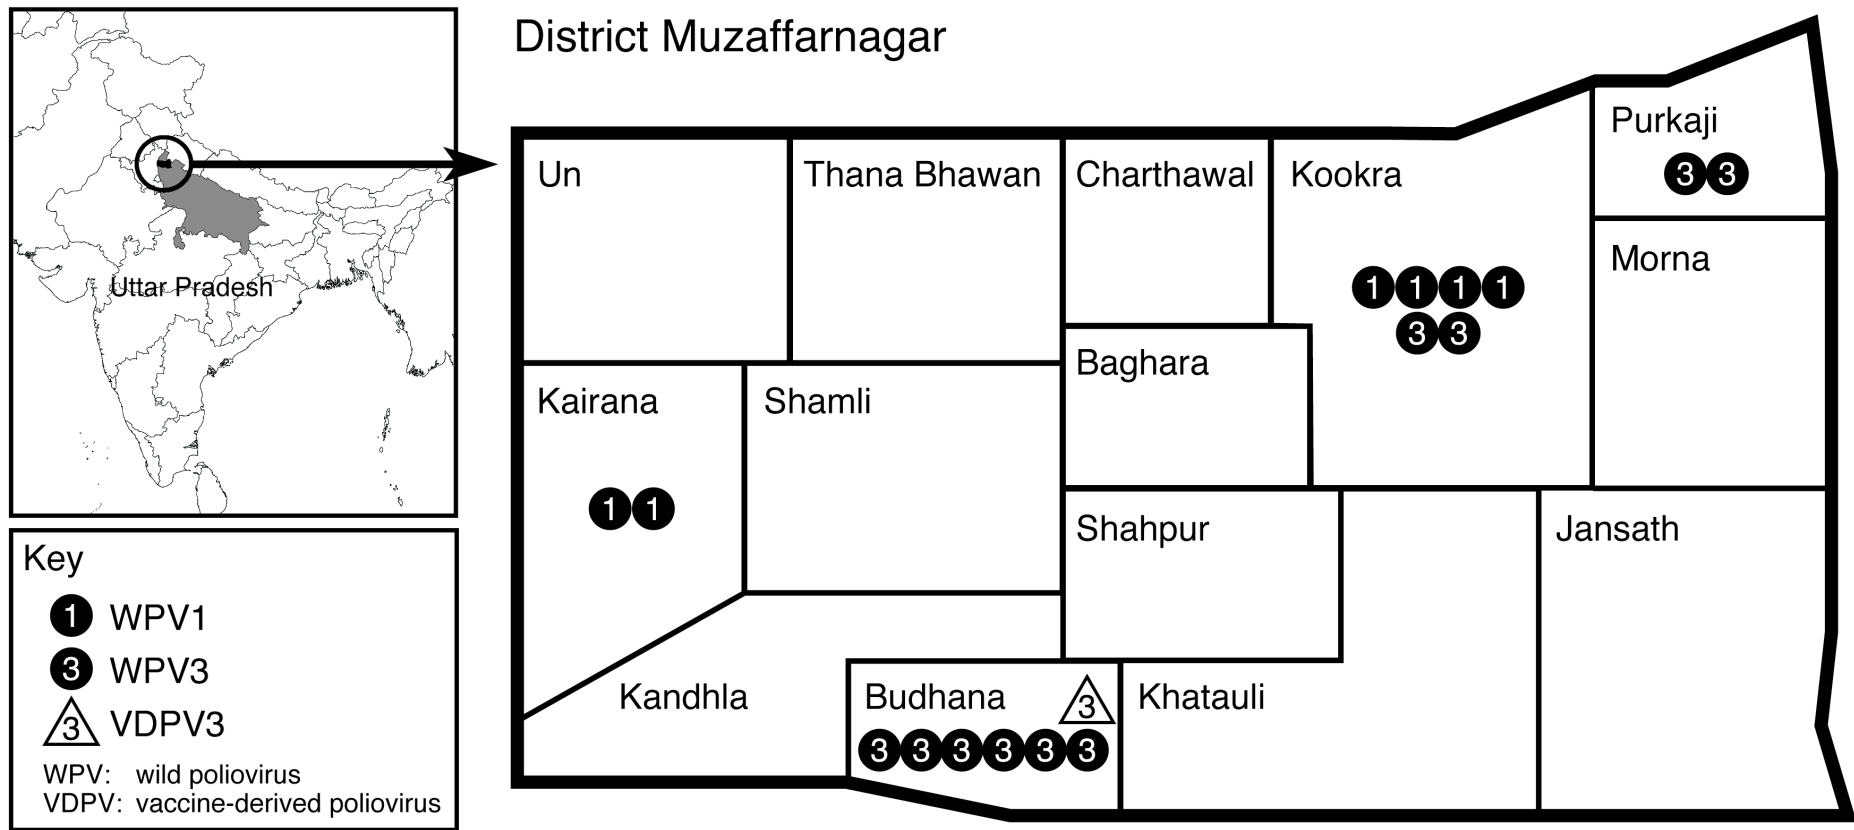

Supplement: MOESM1 [file 9491138]
